# Supplementary material for: TNF-α blockade impairs in vitro tuberculous granuloma formation and down modulate Th1, Th17 and Treg cytokines
Source: PubMed Central journal article supplement (PMC5854376; doi:10.1371/journal.pone.0194430), 2018-03-15
Supplement: pone.0194430.s001.pdf [file pone.0194430.s001.pdf]

| <b>Gender</b> | <b>Clinical form</b> | <b>Age</b> |
|---------------|----------------------|------------|
| Male          | Active               | 65         |
| Male          | Active               | 52         |
| Male          | Active               | 18         |
| Male          | Active               | 64         |
| Male          | Active               | 33         |
| Male          | Active               | 34         |
| Male          | Active               | 34         |
| Male          | Active               | 36         |
| Male          | Active               | 70         |
| Male          | Active               | 56         |
| Male          | Active               | 44         |
| Male          | Active               | 54         |
| Male          | Active               | 73         |
| Male          | Active               | 27         |
| Male          | Active               | 64         |
| Male          | Active               | 39         |
| Male          | Active               | 62         |
| Male          | Active               | 36         |
| Male          | Active               | 26         |
| Female        | Active               | 65         |
| Female        | Active               | 34         |
| Female        | Active               | 27         |
| Female        | Active               | 59         |
| Female        | Active               | 66         |
| Female        | Active               | 77         |
| Female        | Active               | 30         |
| Female        | Active               | 79         |
| Female        | Active               | 60         |
| Female        | Active               | 69         |
| Female        | Active               | 25         |
| Female        | Active               | 25         |
| Male          | Treated              | 85         |
| Male          | Treated              | 60         |
| Male          | Treated              | 79         |
| Male          | Treated              | 62         |
| Male          | Treated              | 49         |
| Male          | Treated              | 47         |
| Male          | Treated              | 37         |
| Male          | Treated              | 28         |
| Male          | Treated              | 46         |
| Female        | Treated              | 32         |
| Female        | Treated              | 40         |
| Female        | Treated              | 80         |
| Female        | Treated              | 30         |
| Female        | Treated              | 54         |
| Female        | Treated              | 50         |
| Female        | Treated              | 70         |
| Female        | Treated              | 29         |
| Female        | Treated              | 27         |

|        |         |    |
|--------|---------|----|
| Female | Treated | 26 |
| Female | Treated | 43 |
| Female | Treated | 47 |
| Female | Treated | 23 |
| Male   | PPD     | 19 |
| Male   | PPD     | 46 |
| Male   | PPD     | 33 |
| Male   | PPD     | 63 |
| Female | PPD     | 21 |
| Female | PPD     | 34 |
| Female | PPD     | 30 |
| Female | PPD     | 51 |
| Male   | Treated | 19 |
| Female | Treated | 46 |
| Female | Treated | 33 |
| Female | Treated | 63 |
| Female | Treated | 21 |
