# Supplementary material for: TNF-α blockade impairs in vitro tuberculous granuloma formation and down modulate Th1, Th17 and Treg cytokines
Source: PubMed Central journal article supplement (PMC5854376; doi:10.1371/journal.pone.0194430), 2018-03-15
Supplement: pone.0194430.s002.pdf [file pone.0194430.s002.pdf]

**Granuloma index Bead Antigen 5 days**

| <b>BEAD<br/>ANTIGEN PPD</b> | <b>BEAD<br/>ANTIGEN PPD<br/>INFLIX</b> | <b>BEAD<br/>ANTIGEN<br/>ACTIVE<br/>DISEASE</b> | <b>BEAD<br/>ANTIGEN<br/>ACTIVED<br/>DISEASE<br/>INFLIX</b> | <b>BEAD<br/>ANTIGEN<br/>TREATED</b> |
|-----------------------------|----------------------------------------|------------------------------------------------|------------------------------------------------------------|-------------------------------------|
| 3.06                        | 2.88                                   | 2.4                                            | 2.3                                                        | 2.68                                |
| 2.92                        | 2.16                                   | 2.46                                           | 2.68                                                       | 2.18                                |
| 3.22                        | 3                                      | 2.2                                            | 2.1                                                        | 3.74                                |
| 2.42                        | 2.36                                   | 2.32                                           | 2.32                                                       | 3.6                                 |
| 2.2                         | 2.32                                   | 2.58                                           | 2.96                                                       | 3.76                                |
| 2.24                        | 2.14                                   | 2.1                                            | 2.32                                                       | 3.48                                |
| 2.24                        | 2.74                                   | 2.9                                            | 3.22                                                       | 3.18                                |
| 2.16                        | 2.3                                    | 2.4                                            | 2.32                                                       | 3.66                                |
| 2.58                        | 2.18                                   | 2.8                                            | 2.9                                                        | 3.5                                 |

**Granuloma index Bead Antigen 10 days**

| <b>BEAD<br/>ANTIGEN PPD</b> | <b>BEAD<br/>ANTIGEN PPD<br/>INFLIX</b> | <b>BEAD<br/>ANTIGEN<br/>ACTIVE<br/>DISEASE</b> | <b>BEAD<br/>ANTIGEN<br/>ACTIVE<br/>DISEASE<br/>INFLIX</b> | <b>BEAD<br/>ANTIGEN<br/>TREATED</b> |
|-----------------------------|----------------------------------------|------------------------------------------------|-----------------------------------------------------------|-------------------------------------|
| 2.54                        | 2.92                                   | 2.98                                           | 2.28                                                      | 3                                   |
| 2.8                         | 2.86                                   | 2.94                                           | 2.32                                                      | 2.26                                |
| 2.92                        | 2.8                                    | 3                                              | 2.54                                                      | 3.6                                 |
| 2.82                        | 3.06                                   | 2.94                                           | 3                                                         | 2.64                                |
| 2.96                        | 3.26                                   | 2.36                                           | 2.18                                                      | 3.08                                |
| 3.46                        | 3.56                                   | 2.18                                           | 2.42                                                      | 3.54                                |
| 2.88                        | 2.94                                   | 3.68                                           | 4.1                                                       | 2.94                                |
| 3                           | 2.58                                   | 2.68                                           | 2.84                                                      | 3                                   |
| 2.95                        | 2.77                                   | 2.3                                            | 2.34                                                      | 2.7                                 |

**BEAD  
ANTIGEN  
TREATED  
INFLIX**

2.68  
2.38  
3.1  
2.9  
2.78  
2.88  
2.72  
2.22  
2.39

**BEAD  
ANTIGEN  
TREATED  
INFLIX**

3.12  
2.48  
3.24  
2.62  
2.62  
2.42  
2.2  
2.34  
2.13
