# Supplementary material for: TNF-α blockade impairs in vitro tuberculous granuloma formation and down modulate Th1, Th17 and Treg cytokines
Source: PubMed Central journal article supplement (PMC5854376; doi:10.1371/journal.pone.0194430), 2018-03-15
Supplement: pone.0194430.s003.pdf [file pone.0194430.s003.pdf]

**PPD TNF**

| <b>MEDIUM</b> | <b>MEDIUM INFLIX</b> | <b>ANTIGEN</b> | <b>ANTIGEN INFLIX</b> | <b>BEAD</b> |
|---------------|----------------------|----------------|-----------------------|-------------|
|               |                      |                |                       | 386.404     |
|               |                      |                |                       | 421.329     |
|               |                      |                |                       | 16.45       |
|               |                      |                |                       | 12.366      |
|               |                      |                |                       | 19.14       |
|               |                      |                |                       | 23.614      |
|               |                      |                |                       | 191.967     |
| 440.847       | 129.126              | 480.249        | 41.898                | 336.303     |
|               |                      | 364.134        | 34.134                | 110.262     |
| 175.611       | 38.901               | 186.072        | 22.107                | 95.478      |
| 391.512       | 44.073               | 334.095        | 47.229                | 122.841     |
| 70.095        | 0                    | 37.287         | 0.291                 | 518.088     |
| 50.787        | 0.291                | 31.98          | 11.979                | 96.831      |
| 155.334       | 8.667                | 166.92         | 35.271                | 386.404     |

**Treated TNF**

| <b>MEDIUM</b> | <b>MEDIUM INFLIX</b> | <b>ANTIGEN</b> | <b>ANTIGEN INFLIX</b> | <b>BEAD</b> |
|---------------|----------------------|----------------|-----------------------|-------------|
|               |                      |                |                       | 168.822     |
|               |                      |                |                       | 288.834     |
|               |                      |                |                       | 147.246     |
|               |                      |                |                       | 67.671      |
|               |                      |                |                       | 106.128     |
|               |                      |                |                       | 125.565     |
|               |                      |                |                       | 82.026      |
|               |                      |                |                       | 80.511      |
|               |                      |                |                       | 273.805     |
|               |                      |                |                       | 463.608     |
| 113.778       | 99.588               | 420.264        | 128.331               | 382.009     |
| 142.701       | 43.047               | 0              | 0                     |             |
| 379.338       | 14.481               | 29.508         | 0                     |             |
| 181.188       | 115.449              | 68.64          | 71.565                | 342.868     |
| 126.135       | 68.64                |                |                       |             |
| 192.183       | 71.565               | 99.15          | 75.51                 | 719.406     |
| 127.848       | 67.671               | 68.64          | 65.265                | 62.477      |
| 87.126        | 61.923               |                |                       | 39.599      |
| 24.033        | 0                    | 39.068         | 27.249                | 44.022      |
| 58.271        | 28.177               | 65.015         | 57.228                | 79.889      |

|         |         |         |         |         |
|---------|---------|---------|---------|---------|
| 16.415  | 0       | 36.959  | 28.642  | 47.002  |
| 70.775  | 22.934  | 74.658  | 3.687   | 568.822 |
| 48.218  | 14.538  | 105.593 | 0       | 144.022 |
| 213.778 | 199.588 | 320.264 | 228.331 | 239.599 |
| 46.415  | 2.36    | 66.959  | 28.642  | 653.312 |
| 58.271  | 28.177  | 145.015 | 57.228  | 247.002 |
| 148.218 | 84.538  | 905.593 | 139.36  | 273.805 |

**Active disease TNF**

| <b>MEDIUM</b> | <b>MEDIUM INFLIX</b> | <b>ANTIGEN</b> | <b>ANTIGEN INFLIX</b> | <b>BEAD</b> |
|---------------|----------------------|----------------|-----------------------|-------------|
|               |                      |                |                       | 173.508     |
|               |                      |                |                       | 620.202     |
|               |                      |                |                       | 59.217      |
|               |                      |                |                       | 304.107     |
|               |                      |                |                       | 37.392      |
|               |                      |                |                       | 87.564      |
|               |                      |                |                       | 407.052     |
|               |                      |                |                       | 188.217     |
|               |                      |                |                       | 294.954     |
|               |                      |                |                       | 1.062.617   |
| 291.078       | 269.007              |                |                       | 265.602     |
| 1.323.861     | 68.118               | 2.348.133      | 1.242.699             | 928.983     |
| 34.134        | 29.835               | 99.87          | 68.049                | 463.511     |
| 140.649       | 68.049               | 149.067        | 115.26                | 74.064      |
| 63.054        | 38.484               | 135.108        | 123.15                | 468.441     |
| 45.108        | 33.054               | 92.304         | 84.888                | 679.681     |
| 390.111       | 203.421              | 118.482        | 89.772                | 356.476     |
| 189.738       | 11.475               | 0              | 0                     | 24.226      |
| 399.348       | 101.853              | 20.49          | 0                     | 122.333     |
| 20.414        | 6.122                | 44.022         | 15.098                | 260.568     |
| 9.068         | 7.8                  | 914.239        | 11.201                | 910.12      |
| 292.191       | 1.035                | 475.918        | 250.876               | 26.875      |
| 1159.93       | 33.298               | 122.553        | 45.185                | 0.123       |
| 102.354       | 0                    | 2.829          | 0                     | 10.078      |
| 19.164        | 0                    | 8.245          | 0                     | 273.508     |
| 6.075         | 0                    | 148.085        | 0                     | 122.333     |
| 391.078       | 269.007              |                |                       | 304.107     |
| 129.068       | 87.8                 | 914.239        | 211.201               | 1.620.202   |
| 940.649       | 268.049              | 1.249.067      | 515.26                | 787.564     |
| 1.323.861     | 768.118              | 2.348.133      | 1.242.699             | 474.064     |
| 845.108       | 233.054              | 1.292.304      | 784.888               | 463.511     |

**PPD IFN**

| <b>MEDIUM</b> | <b>MEDIUM INFLIX</b> | <b>ANTIGEN</b> | <b>ANTIGEN INFLIX</b> | <b>BEAD</b> |
|---------------|----------------------|----------------|-----------------------|-------------|
|               |                      |                |                       | 230.163     |
|               |                      |                |                       | 132.253     |
|               |                      |                |                       | 202.973     |
|               |                      |                |                       | 25.36       |
|               |                      |                |                       | 47.956      |
|               |                      |                |                       | 12.367      |
|               |                      |                |                       | 0           |
| 0             | 0                    | 0              | 0                     | 280.508     |
| 525.65        | 241.156              | 867.937        | 85.415                | 164.559     |
|               |                      | 389.901        | 123.402               | 259.326     |
| 20.844        | 49.716               | 38.091         | 23.703                | 569.61      |
| 0             | 0                    | 79.215         | 76.236                | 165.147     |
| 330.816       | 88.188               | 0              | 604.761               | 293.025     |
| 203.478       | 67.341               | 61.44          | 91.191                | 55.566      |
| 127.719       | 935.088              | 474.633        | 70.299                | 230.163     |

**Treated IFN**

| <b>MEDIUM</b> | <b>MEDIUM INFLIX</b> | <b>ANTIGEN</b> | <b>ANTIGEN INFLIX</b> | <b>BEAD</b> |
|---------------|----------------------|----------------|-----------------------|-------------|
|               |                      |                |                       | 433.373     |
|               |                      |                |                       | 664.926     |
|               |                      |                |                       | 546.471     |
|               |                      |                |                       | 152.412     |
|               |                      |                |                       | 110.403     |
|               |                      |                |                       | 142.503     |
|               |                      |                |                       | 88.269      |
|               |                      |                |                       | 68.655      |
|               |                      |                |                       | 20.871      |
|               |                      |                |                       | 217.089     |
| 431.879       | 323.909              | 1.628.866      | 227.81                | 31.511      |
| 1.551.633     | 311.706              | 120.789        | 69.708                | 0           |
| 691.143       | 0                    | 105.705        | 63.096                | 10.091      |
| 218.421       | 141.267              |                |                       | 0           |
| 101.784       | 62.538               |                |                       | 21.58       |
| 78.453        | 66.207               | 952.026        | 122.73                | 261.098     |
| 82.131        | 60.093               | 182.223        | 46.659                | 27.155      |
| 52.761        | 64.983               |                |                       | 24.308      |
| 34.777        | 18.555               | 30.971         | 83.868                | 22.948      |
| 28.378        | 16.961               | 125.803        | 19.947                | 53.188      |
| 37.982        | 17.513               | 56.379         | 17.585                | 424.248     |

|         |         |           |         |         |
|---------|---------|-----------|---------|---------|
| 65.738  | 29.076  | 468.307   | 460.646 | 333.373 |
| 683.706 | 30.368  | 845.979   | 42.318  | 22.948  |
| 531.879 | 323.909 | 1.328.866 | 527.81  | 24.308  |
| 37.982  | 17.513  | 56.379    | 17.585  | 321.58  |
| 28.378  | 16.961  | 125.803   | 19.947  | 424.248 |
| 683.706 | 130.368 | 845.979   | 242.318 | 90.871  |

**Active disease IFN**

| <b>MEDIUM</b> | <b>MEDIUM INFLIX</b> | <b>ANTIGEN</b> | <b>ANTIGEN INFLIX</b> | <b>BEAD</b> |
|---------------|----------------------|----------------|-----------------------|-------------|
|               |                      |                |                       | 0           |
|               |                      |                |                       | 0           |
|               |                      |                |                       | 0           |
|               |                      |                |                       | 66.729      |
|               |                      |                |                       | 553.428     |
|               |                      |                |                       | 843.33      |
|               |                      |                |                       | 899.523     |
|               |                      |                |                       | 747.822     |
|               |                      |                |                       | 67.548      |
| 118.285       | 0                    | 369.078        | 0                     | 103.211     |
| 1.950.702     | 1.626.195            | 2.204.711      | 1209.8                | 20.055      |
| 97.898        | 0                    | 143.686        | 0                     | 7.116       |
| 258.627       | 211.638              | 4531.53        | 1.309.257             | 149.899     |
| 1.090.575     | 54.861               | 1.828.992      | 1.030.419             | 79.999      |
| 1.207.134     | 143.052              | 2.145.084      | 389.901               | 289.175     |
| 1032.81       | 581.649              | 572.859        | 293.868               | 85.804      |
| 660.552       | 253.668              | 594.822        | 51.39                 | 17.656      |
| 1067.04       | 119.055              | 69.071         | 0                     | 18.097      |
| 22.446        | 15.831               | 76.187         | 36.125                | 33.42       |
| 18.712        | 15.545               | 334.29         | 19.947                | 33.577      |
| 704.95        | 112.468              | 105.661        | 41.906                | 212.369     |
| 418.788       | 28                   | 122.259        | 47.121                | 186.152     |
| 701.69        | 229.744              | 929.892        | 69.094                | 747.612     |
| 513.713       | 72.261               | 1.097.087      | 94.546                | 136.369     |
| 812.372       | 421.362              | 1.443.055      | 176.28                | 218.097     |
| 118.285       | 0                    | 369.078        | 125.326               | 366.729     |
| 118.712       | 85.545               | 334.29         | 119.947               | 893.369     |
| 258.627       | 211.638              | 4531.53        | 1.309.257             | 1375.23     |
| 1.950.702     | 1.626.195            | 2.204.711      | 1209.8                | 149.899     |
| 1.207.134     | 143.052              | 2.145.084      | 389.901               | 77.116      |

| <b>MEDIUM</b> | <b>MEDIUM INFLIX</b> | <b>ANTIGEN</b> | <b>ANTIGEN INFLIX</b> | <b>BEAD</b> |
|---------------|----------------------|----------------|-----------------------|-------------|
|               |                      |                |                       | 240.291     |
|               |                      |                |                       | 2.217.588   |
|               |                      |                |                       | 1.065.885   |
|               |                      |                |                       | 62.991      |
|               |                      |                |                       | 25.364      |
|               |                      |                |                       | 67.514      |
|               |                      |                |                       | 22.747      |
|               |                      |                |                       | 1.435.296   |
|               |                      |                |                       | 546.132     |
| 1.001.178     | 621.063              | 1.864.272      | 1.493.211             | 113.484     |
|               |                      | 3.480.225      | 871.077               | 339.546     |
| 63.21         | 22.272               | 330.156        | 0                     | 695.358     |
| 300.303       | 81.336               | 689.529        | 133.194               | 97.272      |
| 105.984       | 75.897               | 360.078        | 30.15                 | 635.466     |
| 59.814        | 9.249                | 453.327        | 0                     | 446.337     |
| 718.449       | 371.949              | 290.412        | 63.663                | 640.291     |

**Treated IL-10**

| <b>MEDIUM</b> | <b>MEDIUM INFLIX</b> | <b>ANTIGEN</b> | <b>ANTIGEN INFLIX</b> | <b>BEAD</b> |
|---------------|----------------------|----------------|-----------------------|-------------|
|               |                      |                |                       | 3.569.826   |
|               |                      |                |                       | 55.686      |
|               |                      |                |                       | 57.621      |
|               |                      |                |                       | 91.84       |
|               |                      |                |                       | 23.369      |
|               |                      |                |                       | 91.84       |
|               |                      |                |                       | 0           |
|               |                      |                |                       | 1.957       |
|               |                      |                |                       | 35.321      |
|               |                      |                |                       | 433.053     |
| 2.636.364     | 2403.93              | 2.533.029      | 1.516.527             | 772.797     |
| 36.489        | 18.453               | 46.566         | 18.453                | 326.325     |
| 67.314        | 19.398               | 32.676         | 9.981                 | 62.703      |
| 94.588        | 128.934              |                |                       | 5.698       |
| 0             | 0                    |                |                       | 250.127     |
| 322.646       | 131.682              | 236.094        | 215.486               | 617.105     |
| 28.06         | 0                    | 51.415         | 19.13                 | 54.31       |
| 28.06         | 0                    |                |                       | 48.616      |
| 69.554        | 37.11                | 61.942         | 167.736               | 45.896      |
| 56.756        | 33.922               | 251.606        | 39.894                | 106.376     |
| 75.964        | 35.026               | 112.758        | 35.17                 | 848.496     |

|           |         |           |         |           |
|-----------|---------|-----------|---------|-----------|
| 131.476   | 58.152  | 936.614   | 921.292 | 2.569.826 |
| 100.253   | 46.712  | 1.691.958 | 84.636  | 925.896   |
| 2.636.364 | 2403.93 | 1.533.029 | 816.527 | 148.616   |
| 175.964   | 135.026 | 512.758   | 235.17  | 450.127   |
| 156.756   | 58.922  | 351.606   | 99.894  | 848.496   |
| 100.253   | 46.712  | 1.691.958 | 384.636 | 135.321   |

**Active IL-10**

| <b>MEDIUM</b> | <b>MEDIUM INFLIX</b> | <b>ANTIGEN</b> | <b>ANTIGEN INFLIX</b> | <b>BEAD</b> |
|---------------|----------------------|----------------|-----------------------|-------------|
|               |                      |                |                       | 1.586.994   |
|               |                      |                |                       | 866.175     |
|               |                      |                |                       | 1672.44     |
|               |                      |                |                       | 0           |
|               |                      |                |                       | 0           |
|               |                      |                |                       | 0           |
|               |                      |                |                       | 50.868      |
|               |                      |                |                       | 53.757      |
|               |                      |                |                       | 74.13       |
|               |                      |                |                       | 898.802     |
| 1.730.244     | 1.253.571            | 1412.28        | 854.388               | 109.71      |
| 1.864.272     | 812.994              | 3.101.256      | 1.423.776             | 697.978     |
| 1.966.218     | 923.265              | 1.714.155      | 1.579.224             | 7.116       |
| 284.151       | 32.214               | 398.043        | 157.443               | 934.464     |
| 182.964       | 50.763               | 1.067.538      | 0                     | 908.857     |
| 0             | 0                    | 2.442          | 0                     | 124.15      |
| 86.865        | 55.686               | 112.614        | 100.686               | 434.387     |
| 78.039        | 26.973               | 49.398         | 25.074                | 35.312      |
| 60.522        | 44.142               | 53.757         | 46.059                | 36.194      |
| 44.892        | 31.662               | 152.374        | 72.25                 | 66.84       |
| 37.424        | 31.09                | 668.58         | 39.894                | 67.154      |
| 1409.9        | 224.936              | 211.322        | 83.812                | 424.738     |
| 837.576       | 56                   | 244.518        | 94.242                | 372.304     |
| 1403.38       | 459.488              | 1.859.784      | 138.188               | 1.495.224   |
| 1.027.426     | 144.522              | 2.194.174      | 189.092               | 1.586.994   |
| 1.624.744     | 842.724              | 2886.11        | 352.56                | 536.194     |
| 1.730.244     | 1.253.571            | 1412.28        | 854.388               | 236.359     |
| 237.424       | 131.09               | 1668.58        | 839.894               | 1.866.175   |
| 384.151       | 132.214              | 698.043        | 357.443               | 550.868     |
| 1.864.272     | 812.994              | 3.101.256      | 1.423.776             | 934.464     |
| 386.865       | 155.686              | 912.614        | 300.686               | 87.116      |

**PPD IL-12**

| <b>MEDIUM</b> | <b>MEDIUM<br/>INFLIX</b> | <b>ANTIGEN</b> | <b>ANTIGEN<br/>INFLIX</b> | <b>BEAD</b> |
|---------------|--------------------------|----------------|---------------------------|-------------|
|               |                          |                |                           | 4488.67     |
|               |                          |                |                           | 2.415.572   |
|               |                          |                |                           | 651.382     |
|               |                          |                |                           | 399.422     |
|               |                          |                |                           | 1101.52     |
|               |                          |                |                           | 530.168     |
|               |                          |                |                           | 443.594     |
|               |                          |                |                           | 243.732     |
| 3.752.556     | 2730.36                  | 1613.28        | 367.71                    | 105.522     |
| 730.098       | 401.853                  | 616.851        | 253.659                   | 57.072      |
|               |                          | 386.586        | 176.586                   | 174.948     |
| 272.694       | 237.784                  | 447.228        | 291.274                   | 562.988     |
| 824.526       | 517.158                  | 858.61         | 733.066                   | 0           |
| 31.848        | 11.556                   | 39.148         | 39.148                    | 8.322       |
| 524.6         | 273.498                  | 100.828        | 59.32                     | 362.988     |
| 624.526       | 217.158                  | 758.61         | 533.066                   | 4488.67     |

**Treated IL-12**

| <b>MEDIUM</b> | <b>MEDIUM<br/>INFLIX</b> | <b>ANTIGEN</b> | <b>ANTIGEN<br/>INFLIX</b> | <b>BEAD</b> |
|---------------|--------------------------|----------------|---------------------------|-------------|
|               |                          |                |                           | 969.03      |
|               |                          |                |                           | 142.626     |
|               |                          |                |                           | 122.706     |
|               |                          |                |                           | 91.84       |
|               |                          |                |                           | 12.399      |
|               |                          |                |                           | 91.84       |
|               |                          |                |                           | 0           |
|               |                          |                |                           | 3184.44     |
|               |                          |                |                           | 6.289.432   |
| 711.381       | 442.65                   | 429.177        | 257.652                   | 626.658     |
| 315.468       | 175.278                  | 300.522        | 111.939                   | 2.580.028   |
| 447.132       | 333.003                  | 174.378        | 78.912                    | 2.201.786   |
| 94.588        | 128.934                  |                |                           | 3.935.188   |
| 0             | 0                        |                |                           | 2.691.226   |
| 322.646       | 131.682                  | 236.094        | 215.486                   |             |
| 56.12         | 0                        | 102.83         | 38.26                     | 657.003     |
| 56.12         | 0                        |                |                           | 1461.35     |
| 411.249       | 16.273                   | 978.037        | 115.501                   | 706.824     |
| 1.102.932     | 634.316                  | 414.683        | 428.471                   | 4.183.458   |
| 498.703       | 545.51                   | 611.824        | 13.534                    | 2.497.922   |

|           |           |           |           |           |
|-----------|-----------|-----------|-----------|-----------|
| 3.212.822 | 1.719.089 | 1.852.769 | 527.589   | 969.03    |
| 1.945.764 | 1.370.357 | 3.032.644 | 2.079.445 | 1.706.824 |
| 711.381   | 442.65    | 429.177   | 257.652   | 1461.35   |
| 498.703   | 545.51    | 611.824   | 13.534    | 2.691.226 |
| 1.102.932 | 634.316   | 434.683   | 428.471   | 2.497.922 |
| 1.945.764 | 1.370.357 | 3.032.644 | 2.079.445 | 3184.44   |

**Active disease IL-12**

| <b>MEDIUM</b> | <b>MEDIUM INFLIX</b> | <b>ANTIGEN</b> | <b>ANTIGEN INFLIX</b> | <b>BEAD</b> |
|---------------|----------------------|----------------|-----------------------|-------------|
|               |                      |                |                       | 435.735     |
|               |                      |                |                       | 190.314     |
|               |                      |                |                       | 86.826      |
|               |                      |                |                       | 130.272     |
|               |                      |                |                       | 57.315      |
|               |                      |                |                       | 91.977      |
|               |                      |                |                       | 173.982     |
|               |                      |                |                       | 184.203     |
|               |                      |                |                       | 156.993     |
|               |                      |                |                       | 9.964.572   |
| 594.105       | 212.454              | 533.001        | 149.781               | 4.052.404   |
| 316.851       | 135.735              | 541.755        | 223.335               | 8519.81     |
| 296.586       | 55.632               | 454.2          | 94.485                | 3.592.524   |
| 383.097       | 214.485              | 405.018        | 76.368                | 669.97      |
| 356.343       | 237.561              | 389.073        | 78.435                | 1.466.742   |
| 269.073       | 56.343               | 490.476        | 128.619               | 7.989.164   |
| 509.115       | 278.547              | 457.083        | 142.545               | 6407.09     |
| 441.879       | 376.44               | 430.752        | 166.872               | 205.81      |
| 515.667       | 356.55               | 352.548        | 81.939                | 63.644      |
| 421.566       | 268.711              | 350.369        | 0                     | 667.082     |
| 297.72        | 196.56               | 5.505.263      | 353.706               | 1085.56     |
| 1114.62       | 120.735              | 324.162        | 45.177                | 1.394.346   |
| 1.178.555     | 620.584              | 1.538.911      | 1.201.803             | 1.066.241   |
| 1.349.908     | 1.069.185            | 1.520.533      | 571.616               | 2.672.936   |
| 1.324.719     | 391.256              | 324.192        | 317.035               | 1.435.735   |
| 3.415.103     | 2.390.009            | 2.413.128      | 1.835.662             | 1.363.644   |
| 1.594.105     | 812.454              | 1.533.001      | 349.781               | 830.272     |
| 1297.72       | 696.56               | 5.505.263      | 1.353.706             | 1.190.314   |
| 1.383.097     | 814.485              | 2.405.018      | 1.276.368             | 91.977      |
| 1.316.851     | 835.735              | 3.541.755      | 1.223.335             | 969.97      |
| 269.073       | 56.343               | 490.476        | 128.619               | 3.592.524   |

| <b>MEDIUM</b> | <b>MEDIUM INFLIX</b> | <b>ANTIGEN</b> | <b>ANTIGEN INFLIX</b> | <b>BEAD</b> |
|---------------|----------------------|----------------|-----------------------|-------------|
|               |                      |                |                       | 207.77      |
|               |                      |                |                       | 257.65      |
|               |                      |                |                       | 138.354     |
|               |                      |                |                       | 238.135     |
|               |                      |                |                       | 10.258      |
|               |                      |                |                       | 28.189      |
|               |                      |                |                       | 9.258       |
|               |                      |                |                       | 235.731     |
| 704.295       | 109.89               | 542.163        | 129.135               | 43.998      |
| 171.231       | 36.96                | 122.055        | 54.393                | 80.076      |
|               |                      | 0              | 0                     | 125.072     |
| 148.13        | 73.654               | 45.896         | 0                     | 123.738     |
| 164.842       | 0                    | 0              | 0                     | 61.424      |
| 95.02         | 0                    | 0              | 0                     | 95.02       |
| 20.578        | 0                    | 0              | 0                     | 29.644      |
| 44.72         | 0                    | 0              | 0                     | 207.77      |

**Treated IL-17**

| <b>MEDIUM</b> | <b>MEDIUM INFLIX</b> | <b>ANTIGEN</b> | <b>ANTIGEN INFLIX</b> | <b>BEAD</b> |
|---------------|----------------------|----------------|-----------------------|-------------|
|               |                      |                |                       | 165.231     |
|               |                      |                |                       | 215.751     |
|               |                      |                |                       | 282.018     |
|               |                      |                |                       | 3.844       |
|               |                      |                |                       | 21.532      |
|               |                      |                |                       | 18.294      |
|               |                      |                |                       | 19.912      |
|               |                      |                |                       | 30.494      |
|               |                      |                |                       | 0           |
|               |                      |                |                       | 382.5       |
| 227.073       | 70.737               | 1.203.237      | 1.075.218             | 773.934     |
| 185.046       | 76.071               | 104.046        | 55.794                | 0           |
| 269.955       | 89.109               | 164.514        | 48.261                | 7.554       |
| 3.048         | 1.456                |                |                       | 0           |
| 92.788        | 75.606               |                |                       | 5.144       |
| 7.038         | 2.252                | 90.194         | 0                     | 877.568     |
| 14.258        | 6.238                | 0              | 0                     | 251.024     |
| 11.042        | 0                    |                |                       | 375.064     |
| 725.56        | 346.176              | 184.616        | 165.84                | 168.144     |
| 539.992       | 232.928              | 269.616        | 99.712                | 343.648     |
| 276.4         | 239.52               | 126.248        | 73.88                 | 120.608     |

|         |         |           |         |         |
|---------|---------|-----------|---------|---------|
| 394.376 | 75.632  | 63.472    | 73.184  | 165.231 |
| 46.712  | 100.376 | 123.16    | 58.656  | 168.144 |
| 227.073 | 70.737  | 1.203.237 | 975.218 | 375.064 |
| 276.4   | 239.52  | 126.248   | 73.88   | 85.144  |
| 539.992 | 232.928 | 269.616   | 99.712  | 120.608 |
| 346.712 | 100.376 | 123.16    | 58.656  | 23.23   |

**active disease IL-17**

| <b>MEDIUM</b> | <b>MEDIUM INFLIX</b> | <b>ANTIGEN</b> | <b>ANTIGEN INFLIX</b> | <b>BEAD</b> |
|---------------|----------------------|----------------|-----------------------|-------------|
|               |                      |                |                       | 213.624     |
|               |                      |                |                       | 353.334     |
|               |                      |                |                       | 394.776     |
|               |                      |                |                       | 800.904     |
|               |                      |                |                       | 272.649     |
|               |                      |                |                       | 201.096     |
|               |                      |                |                       | 160.218     |
|               |                      |                |                       | 225.279     |
|               |                      |                |                       | 211.041     |
|               |                      |                |                       | 69.96       |
| 326.565       | 177.564              | 249.135        | 143.823               | 162.87      |
| 196.149       | 103.677              | 187.563        | 76.389                | 0           |
| 292.107       | 122.103              | 103.971        | 83.19                 | 510.859     |
| 265.275       | 149.643              | 92.697         | 32.046                |             |
| 191.871       | 91.587               | 38.268         | 4.407                 |             |
| 73.971        | 26.532               | 228.486        | 0                     | 100.722     |
| 427.809       | 238.209              | 177.621        | 0                     | 109.548     |
| 198.663       | 65.769               | 177.954        | 95.199                | 246.144     |
| 290.757       | 92.751               | 232.785        | 107.679               | 91.024      |
| 156.576       | 141.304              | 141.304        | 91.024                | 151.648     |
| 126.248       | 88.144               | 752.992        | 71.056                | 107.92      |
| 290.168       | 100.376              | 146.416        | 80.528                | 239.304     |
| 130.856       | 75.632               | 120.608        | 110.448               | 178.56      |
| 1175.96       | 394.44               | 405.448        | 145.048               | 122.784     |
| 269.224       | 215.952              | 114.616        | 98.56                 | 213.624     |
| 178.56        | 147.88               | 276.472        | 114.616               | 91.024      |
| 326.565       | 177.564              | 249.135        | 143.823               | 800.904     |
| 126.248       | 88.144               | 752.992        | 71.056                | 953.334     |
| 265.275       | 149.643              | 92.697         | 32.046                | 201.096     |
| 596.149       | 303.677              | 987.563        | 376.389               | 1.136.194   |
| 73.971        | 26.532               | 228.486        | 0                     | 510.859     |

| <b>BEAD INFLIX</b> | <b>BEAD ANTIGEN</b> | <b>BCG ANTIGEN INFLIX</b> |
|--------------------|---------------------|---------------------------|
| 0                  | 272.625             | 0                         |
|                    | 142.164             | 0                         |
| 0                  | 53.924              | 0                         |
| 0                  | 31.599              | 28.323                    |
|                    | 520.062             | 15.227                    |
| 0                  | 0                   | 0                         |
| 15.631             | 45.988              | 0                         |
| 0                  | 38.932              | 0                         |
| 50.496             |                     |                           |
|                    | 391.632             | 64.992                    |
| 54.537             | 173.487             | 20.358                    |
| 17.937             | 242.841             | 33.492                    |
| 37.05              | 96.108              | 56.733                    |
| 0                  | 63.09               | 2.841                     |
| 65.928             | 36.108              | 24.249                    |
| 30.93              | 247.743             | 44.418                    |
| 0                  | 272.625             |                           |

| <b>BEAD INFLIX</b> | <b>BEAD ANTIGEN</b> | <b>BCG ANTIGEN INFLIX</b> |
|--------------------|---------------------|---------------------------|
| 75.252             | 380.187             | 45.246                    |
| 12.978             | 37.029              | 0                         |
| 37.029             | 0                   | 0                         |
| 61.923             |                     |                           |
| 71.565             |                     |                           |
| 76.008             |                     |                           |
| 62.4               | 58.155              | 57.687                    |
| 59.562             |                     |                           |
| 0                  | 165.947             | 0                         |
| 76.65              | 468.441             | 0                         |
| 50.675             | 290.427             | 0                         |
|                    |                     | 0                         |
| 48.397             | 687.111             | 78.435                    |
|                    | 0                   | 0                         |
| 25.684             | 710.423             | 17.513                    |
| 0                  | 3.222               | 0                         |
| 0                  | 60.366              | 54.639                    |
| 24.49              | 163.362             | 9.918                     |
| 45.185             | 89.867              | 75.065                    |

|         |         |         |
|---------|---------|---------|
| 33.298  | 34.714  | 33.883  |
| 275.252 | 480.187 | 145.246 |
| 54.49   | 363.362 | 19.918  |
| 128.36  | 360.366 | 154.639 |
| 348.075 | 758.369 | 256.39  |
| 93.298  | 432.714 | 233.883 |
| 123.6   | 165.947 | 25.369  |

| <b>BEAD INFLIX</b> | <b>BEAD ANTIGEN</b> | <b>BCG ANTIGEN INFLIX</b> |
|--------------------|---------------------|---------------------------|
| 54.42              | 1.898.079           | 1.622.358                 |
| 112.305            |                     |                           |
| 52.989             | 335.538             | 113.958                   |
| 133.854            | 76.416              | 70.416                    |
| 29.835             | 60.906              | 49.593                    |
| 59.871             | 93.552              | 70.416                    |
| 77.7               | 49.068              | 0                         |
| 0                  | 0                   | 0                         |
| 15.981             | 41.541              | 0                         |
| 27.743             | 1.111.251           | 24.73                     |
| 187.518            | 265.022             | 187.518                   |
| 30.711             | 553.588             | 25.57                     |
| 37.396             | 357.524             | 54.689                    |
| 20.953             | 34.173              | 1.593                     |
| 0                  | 344.697             | 0                         |
| 29.096             | 857.513             | 26.471                    |
| 29.983             | 152.87              | 30.085                    |
| 18.183             | 48.018              | 9.068                     |
| 0                  | 9.068               | 0                         |
| 20.094             | 639.263             | 12.886                    |
| 537.806            | 1453.94             | 63.115                    |
| 0                  | 9.332               | 0                         |
| 0                  | 0.02                | 0                         |
| 0                  | 48.09               | 0                         |
| 154.42             | 1.898.079           | 1.522.358                 |
| 89.369             | 399.068             | 123.589                   |
| 133.854            | 576.416             | 270.416                   |
| 1.112.305          |                     |                           |
| 259.871            | 993.552             | 570.416                   |
| 120.953            | 634.173             | 211.593                   |
| 237.396            | 357.524             | 154.689                   |

| <b>BEAD INFLIX</b> | <b>BEAD ANTIGEN</b> | <b>BEAD ANTIGEN INFLIX</b> |
|--------------------|---------------------|----------------------------|
| 0                  | 521.908             | 0                          |
| 0                  | 734.291             | 0                          |
| 0                  | 675.926             | 34.992                     |
|                    | 344.637             | 51.958                     |
| 0                  | 0                   | 0                          |
| 121.82             | 40.685              | 0                          |
| 0                  | 0                   | 0                          |
| 0                  | 191.94              | 0                          |
| 107.518            | 297.716             | 85.415                     |
| 63.753             | 355.956             | 23.457                     |
| 709.158            | 32.319              | 26.568                     |
| 856.383            | 61.44               | 130.803                    |
| 88.188             | 136.989             | 88.188                     |
| 140.094            | 43.893              | 592.986                    |
| 46.8               | 38.091              | 46.8                       |
| 0                  | 521.908             | 0                          |

| <b>BEAD INFLIX</b> | <b>BEAD ANTIGEN</b> | <b>BCG ANTIGEN INFLIX</b> |
|--------------------|---------------------|---------------------------|
| 135.564            | 219.937             | 0                         |
| 222.342            | 137.058             | 0                         |
| 0                  | 0                   | 0                         |
| 82.131             |                     |                           |
| 64.983             |                     |                           |
| 67.431             |                     |                           |
| 69.879             | 42.999              | 46.659                    |
| 58.869             |                     |                           |
| 0                  | 0                   | 0                         |
| 107.261            | 402.083             | 83.309                    |
| 0                  | 148.544             | 0                         |
| 0                  | 0                   | 0                         |
| 13.401             |                     |                           |
| 0                  | 0                   | 0                         |
| 186.516            | 53.516              | 0                         |
| 27.616             | 287.776             | 21.19                     |
| 17.656             | 28.254              | 24.094                    |
| 16.762             | 31.376              | 19.193                    |
| 16.961             | 24.964              | 16.894                    |
| 42.943             | 358.679             | 22.163                    |
| 31.054             | 89.429              | 37.287                    |

|         |         |         |
|---------|---------|---------|
| 235.564 | 219.937 | 98.326  |
| 16.961  | 24.964  | 16.894  |
| 16.762  | 31.376  | 19.193  |
| 186.516 | 553.516 | 125.36  |
| 131.054 | 689.429 | 237.287 |
| 23.6    | 123.6   | 45.369  |

| <b>BEAD INFLIX</b> | <b>BEAD ANTIGEN</b> | <b>BCG ANTIGEN INFLIX</b> |
|--------------------|---------------------|---------------------------|
| 0                  | 0                   | 0                         |
| 0                  | 0                   | 0                         |
| 0                  | 0                   | 0                         |
| 45.621             | 1.772.271           | 1.309.257                 |
| 106.281            |                     |                           |
|                    | 83.178              | 50.859                    |
| 360.675            | 123.555             | 82.995                    |
| 159.537            | 10.677              | 0                         |
| 0                  | 0                   | 0                         |
| 20.152             | 295.193             | 0                         |
| 0                  | 0                   | 0                         |
| 0                  | 0                   | 0                         |
| 0                  | 0                   | 0                         |
| 40.44              | 32.446              | 0                         |
| 22.164             | 16.517              | 0                         |
| 0                  | 513.166             | 0                         |
| 0                  | 0                   | 0                         |
| 15.715             | 18.712              | 15.658                    |
| 15.949             | 18.791              | 15.658                    |
| 28.116             | 65.136              | 51.176                    |
| 21.638             | 149.961             | 38.386                    |
| 61.356             | 220.647             | 16.277                    |
| 47.976             | 143.667             | 22.53                     |
| 534.708            | 152.024             | 59.421                    |
| 89.369             | 256.369             | 123.369                   |
| 115.949            | 358.791             | 215.658                   |
| 145.621            | 2.772.271           | 1.309.257                 |
| 493.369            | 2.893.369           | 1.589.363                 |
| 944.918            | 1.883.178           | 950.859                   |
| 40.44              | 132.446             | 23.693                    |
| 23.369             | 248.369             | 112.699                   |

| <b>BEAD INFLIX</b> | <b>BEAD ANTIGEN</b> | <b>BCG ANTIGEN INFLIX</b> |
|--------------------|---------------------|---------------------------|
| 608.544            | 223.163             | 652.218                   |
| 213.491            | 2.507.358           | 289.898                   |
| 2.794.734          | 850.198             | 2.297.778                 |
| 30.941             | 210.09              | 182.265                   |
|                    | 674.988             | 699.576                   |
| 0                  | 0                   | 0                         |
| 28.789             | 47.814              | 183.522                   |
| 16.479             | 8.112               | 0                         |
| 812.994            | 1.355.115           | 2.255.964                 |
| 436.884            | 455.907             | 465.45                    |
| 39.639             | 87.723              | 50.763                    |
| 41.052             | 37.509              | 30.06                     |
| 43.002             | 153.108             | 27.108                    |
| 30.6               | 69.759              | 36.09                     |
| 36.069             | 369.78              | 3.09                      |
| 60.522             | 266.121             | 36.09                     |
| 308.544            | 623.163             | 252.218                   |

| <b>BEAD INFLIX</b> | <b>BEAD ANTIGEN</b> | <b>BCG ANTIGEN INFLIX</b> |
|--------------------|---------------------|---------------------------|
| 436.884            |                     |                           |
| 7.167              | 17.292              | 9.981                     |
| 7.167              | 3.423               | 0                         |
| 56.12              |                     |                           |
| 24.522             |                     |                           |
| 78.102             |                     |                           |
| 4.705              | 9.513               | 0                         |
| 0                  |                     |                           |
| 28.269             | 33.171              | 55.484                    |
| 271.023            | 365.15              | 246.512                   |
| 540.275            | 934.91              | 711.063                   |
| 522.633            | 369.422             | 159.161                   |
| 75.696             | 61.221              | 0                         |
| 9.337              | 5.86                | 13.961                    |
| 308.945            | 80.05               | 0                         |
| 472.106            | 702.44              | 417.856                   |
| 35.312             | 56.508              | 48.188                    |
| 33.524             | 62.752              | 38.386                    |
| 33.922             | 49.928              | 33.788                    |
| 85.886             | 717.358             | 44.326                    |
| 62.108             | 178.858             | 74.574                    |

|         |           |         |
|---------|-----------|---------|
| 436.884 |           |         |
| 323.922 | 1.249.928 | 523.788 |
| 53.524  | 262.752   | 68.386  |
| 308.945 | 580.05    | 189     |
| 262.108 | 178.858   | 74.574  |
| 28.269  | 133.171   | 55.484  |

| <b>BEAD INFLIX</b> | <b>BEAD ANTIGEN</b> | <b>BCG ANTIGEN INFLIX</b> |
|--------------------|---------------------|---------------------------|
| 812.994            | 1.321.074           | 1.803.027                 |
| 780.792            | 4.413.128           | 2.410.399                 |
| 1.007.073          | 1.320.933           | 788.598                   |
| 0                  | 0                   | 0                         |
| 0                  | 0                   | 0                         |
| 0                  | 0                   | 0                         |
| 31.722             | 27.921              | 16.566                    |
| 16.566             | 5.292               | 6.231                     |
| 24.129             | 26.022              | 11.859                    |
| 759.933            | 1010.44             | 640.642                   |
| 154.602            | 92.736              | 179.31                    |
| 421.403            | 396.542             | 244.887                   |
| 5.666              | 22.827              | 14.017                    |
| 192.533            | 243.514             | 104.148                   |
| 660.988            | 950.269             | 822.474                   |
| 31.754             | 419.061             | 33.646                    |
| 157.676            | 436.171             | 313.116                   |
| 31.43              | 37.424              | 31.316                    |
| 31.898             | 37.582              | 31.316                    |
| 56.232             | 130.272             | 102.352                   |
| 43.276             | 299.922             | 76.772                    |
| 122.712            | 441.294             | 32.554                    |
| 95.952             | 287.334             | 45.06                     |
| 1.069.416          | 304.048             | 118.842                   |
| 812.994            | 1.821.074           | 1.303.027                 |
| 231.898            | 837.582             | 331.316                   |
| 125.369            | 689.36              | 258.369                   |
| 1.280.792          | 4.413.128           | 2.410.399                 |
| 231.722            | 927.921             | 216.566                   |
| 392.533            | 543.514             | 294.148                   |
| 25.666             | 122.827             | 54.017                    |

| <b>BEAD INFLIX</b> | <b>BEAD ANTIGEN</b> | <b>BCG ANTIGEN INFLIX</b> |
|--------------------|---------------------|---------------------------|
| 1.249.246          | 3.219.046           | 0                         |
| 1.488.906          | 2371.25             | 1329.39                   |
| 0                  | 559.624             | 0                         |
| 137.3              | 441.568             | 163.816                   |
|                    | 2.822.266           | 835.494                   |
| 1.236.966          | 901.222             | 905.972                   |
| 317.344            | 665.562             | 232.676                   |
| 447.648            | 694.328             | 523.886                   |
| 135.735            | 1.129.956           | 682.86                    |
| 69.03              | 432.435             | 284.142                   |
| 54.471             | 414.243             | 263.568                   |
| 122.88             | 143.154             | 123.598                   |
| 318.332            | 600.204             | 482.328                   |
| 7.678              | 0                   | 0                         |
| 18.71              | 12.204              | 28.546                    |
| 118.332            | 200.204             | 182.328                   |
| 1.249.246          | 3.219.046           | 985.3                     |

| <b>BEAD INFLIX</b> | <b>BEAD ANTIGEN</b> | <b>BCG ANTIGEN INFLIX</b> |
|--------------------|---------------------|---------------------------|
| 600.249            | 1.427.613           | 781.623                   |
| 71.733             | 359.16              | 270.522                   |
| 34.248             | 254.709             | 208.056                   |
| 56.12              |                     |                           |
| 24.522             |                     |                           |
| 78.102             |                     |                           |
| 9.41               | 19.026              | 0                         |
| 1.801.428          | 6.475.802           | 1.670.322                 |
| 3.048.956          | 2.258.498           | 2.657.434                 |
| 503.172            | 1358.72             | 710.472                   |
| 1493.54            | 3.924.818           | 1171.06                   |
| 273.646            | 1.149.536           | 391.478                   |
| 2.271.714          | 5.215.826           | 1.843.488                 |
| 1.255.206          |                     |                           |
| 152.358            | 2.148.136           | 115.501                   |
| 262.324            | 1147.05             | 215.107                   |
| 262.324            | 377.211             | 297.72                    |
| 1.713.276          | 2.137.566           | 1.050.686                 |
| 2.265.435          | 1695.84             | 1.358.733                 |

|           |           |           |
|-----------|-----------|-----------|
| 600.249   | 1.427.613 | 781.623   |
| 562.324   | 877.211   | 297.72    |
| 262.324   | 1147.05   | 215.107   |
| 1.255.206 | 3.703.686 | 1.236.023 |
| 2.265.435 | 1695.84   | 1.358.733 |
| 1.801.428 | 6.475.802 | 1.670.322 |

| <b>BEAD INFLIX</b> | <b>BEAD ANTIGEN</b> | <b>BCG ANTIGEN INFLIX</b> |
|--------------------|---------------------|---------------------------|
| 269.697            | 824.097             | 306.468                   |
| 144.825            | 1009.17             | 736.851                   |
| 60.9               | 376.029             | 139.908                   |
| 81.276             | 365.058             | 65.058                    |
| 55.632             | 295.866             | 60.108                    |
| 62.523             | 370.791             | 245.058                   |
| 92.862             | 297.201             | 171.366                   |
| 62.442             | 281.154             | 58.056                    |
| 35.496             | 294.003             | 41.133                    |
| 9.066.564          | 10294.63            | 9.135.216                 |
| 1.573.724          | 3883.24             | 1.318.668                 |
| 4.406.594          | 8161.98             | 5.224.554                 |
| 1.064.764          | 3.301.188           | 726.506                   |
| 775.46             | 538.568             | 383.56                    |
| 425.426            | 1.002.408           | 323.108                   |
| 4.399.774          | 8.356.878           | 3.253.738                 |
| 4.052.404          | 6.718.136           | 2.907.662                 |
| 184.304            | 199.638             | 130.215                   |
| 10.802             | 114.519             | 72.166                    |
| 48.236             | 1114.62             | 125.36                    |
| 922.818            | 1.951.576           | 539.213                   |
| 589.334            | 1.237.724           | 653.54                    |
| 462.846            | 324.035             | 189.023                   |
| 1.230.516          | 1.842.659           | 365.529                   |
| 969.697            | 1.824.097           | 1.206.468                 |
| 510.802            | 2.114.519           | 772.166                   |
| 381.276            | 1.365.058           | 765.058                   |
| 944.825            | 3009.17             | 1.736.851                 |
| 62.523             | 370.791             | 245.058                   |
| 775.46             | 1.538.568           | 883.56                    |
| 1.064.764          | 3.301.188           | 726.506                   |

| <b>BEAD INFLIX</b> | <b>BEAD ANTIGEN</b> | <b>BCG ANTIGEN INFLIX</b> |
|--------------------|---------------------|---------------------------|
| 0                  | 0                   | 0                         |
| 0                  | 0                   | 0                         |
| 0                  | 0                   | 0                         |
| 0                  | 1247.19             | 781.044                   |
|                    | 15.712              | 6.086                     |
| 0                  | 208.343             | 114.783                   |
| 85.585             | 1.449.388           | 233.202                   |
| 0                  | 400.584             | 77.147                    |
| 150.663            | 169.143             | 43.998                    |
| 34.998             | 138.108             | 34.986                    |
| 34.833             | 350.667             | 0                         |
| 0                  | 0                   | 0                         |
| 0                  | 0                   | 0                         |
| 0                  | 0                   | 0                         |
| 0                  | 0                   | 0                         |
| 0                  | 0                   | 0                         |
| 102.362            | 89.32               | 23.06                     |

| <b>BEAD INFLIX</b> | <b>BEAD ANTIGEN</b> | <b>BCG ANTIGEN INFLIX</b> |
|--------------------|---------------------|---------------------------|
| 37.953             | 799.83              | 461.769                   |
| 57.981             | 81.063              | 38.868                    |
| 87.906             | 66.897              | 19.167                    |
| 0                  |                     |                           |
| 3.844              |                     |                           |
| 10.24              |                     |                           |
| 1.456              | 2.252               | 0                         |
| 24.782             |                     |                           |
| 0                  | 0                   | 0                         |
| 6.054              | 5.866               | 0                         |
| 23.086             | 15.206              | 0                         |
| 8.07               | 5.978               | 0                         |
| 442.82             | 6.008               | 0                         |
| 121.316            | 283.797             | 0                         |
| 5.104              | 13.53               | 9.582                     |
| 5.222              | 0                   | 0                         |
| 178.32             | 181.464             | 79.64                     |
| 293.512            | 307.36              | 181.464                   |
| 120.288            | 328.4               | 102.624                   |
| 128.288            | 767.848             | 78.08                     |
| 63.472             | 566.392             | 46.712                    |

|         |         |         |
|---------|---------|---------|
| 37.953  | 799.83  | 461.769 |
| 120.288 | 328.4   | 102.624 |
| 293.512 | 307.36  | 181.464 |
| 25.104  | 113.53  | 39.582  |
| 63.472  | 566.392 | 246.712 |
| 0       | 36.236  | 0       |

| <b>BEAD INFLIX</b> | <b>BEAD ANTIGEN</b> | <b>BCG ANTIGEN INFLIX</b> |
|--------------------|---------------------|---------------------------|
| 123.915            | 93.942              | 70.737                    |
| 62.997             | 94.005              | 54.393                    |
| 105.54             | 30                  | 14.856                    |
| 367.245            | 117.639             | 25.62                     |
| 62.811             | 31.848              | 0                         |
| 68.829             | 0                   | 0                         |
| 92.751             | 59.082              | 40.926                    |
| 52.539             | 51.465              | 29.802                    |
| 77.238             | 77.238              | 43.002                    |
| 0                  | 0                   | 0                         |
| 0                  | 0                   | 0                         |
| 0                  | 0                   | 0                         |
| 127.062            | 71.247              | 104.446                   |
|                    | 459.569             | 61.396                    |
|                    | 9.92                | 511.144                   |
| 0                  | 0                   | 0                         |
| 0                  | 0                   | 0                         |
| 120.288            | 328.144             | 226.368                   |
| 65.432             | 187.776             | 91.024                    |
| 73.184             | 712.072             | 146.416                   |
| 65.896             | 136.024             | 46.712                    |
| 167.992            | 188.632             | 80.328                    |
| 98.56              | 114.616             | 88.08                     |
| 55.184             | 111.912             | 62.616                    |
| 123.915            | 93.942              | 70.737                    |
| 65.432             | 187.776             | 91.024                    |
| 367.245            | 1.117.639           | 825.62                    |
| 562.997            | 1.294.005           | 854.393                   |
| 68.829             | 358.369             | 258.398                   |
| 997.236            |                     |                           |
| 127.062            | 371.247             | 104.446                   |
